# Supplementary material
Source: publisher figshare collection journal article supplement (https://acs.figshare.com/ndownloader/files/7786042)
Supplement: Supplementary file 1 [file 7786042]

# Microbead-Based Platform for Multiplex Detection of DNA and Protein

Xiangjun Liu<sup>\*,†,‡</sup>, Tao Bing<sup>†</sup>, and Dihua Shangguan<sup>\*,†,‡</sup>

<sup>†</sup>Beijing National Laboratory for Molecular Sciences, Key Laboratory of Analytical Chemistry for Living Biosystems, Institute of Chemistry, Chinese Academy of Sciences, Beijing 100190, China

<sup>‡</sup>University of the Chinese Academy of Sciences, Beijing 100049, China

**\* Corresponding Author :**

Tel.: 86-10-62528509, Fax: 86-10-62528509, E-mail: xjliu@iccas.ac.cn.

Tel.: 86-10-62528509, Fax: 86-10-62528509, E-mail: sgdh@iccas.ac.cn.

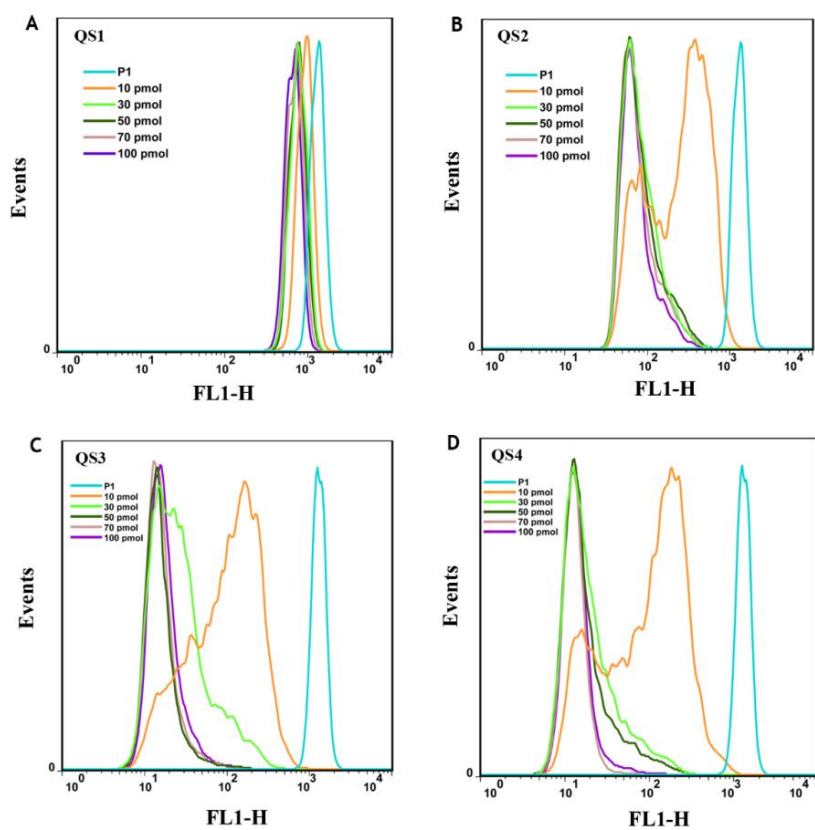

**Figure S1.** Fluorescence changes of P1 modified microbeads in the presence of different amount of QS (A, QS1; B, QS2; C, QS3; D, QS4) DNA.

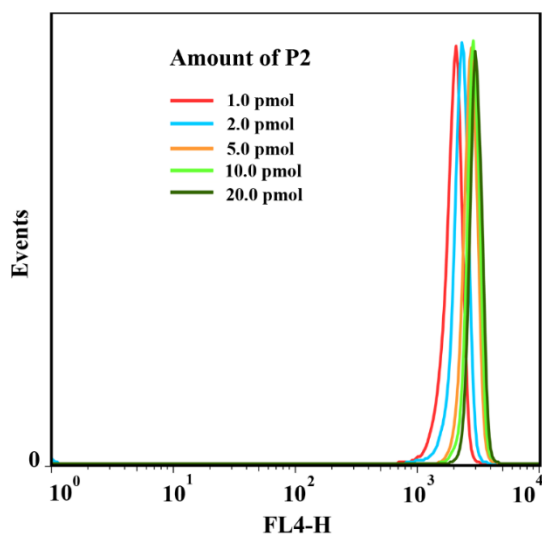

**Figure S2.** Effect of the amount of P2 on the fluorescence of microbeads.

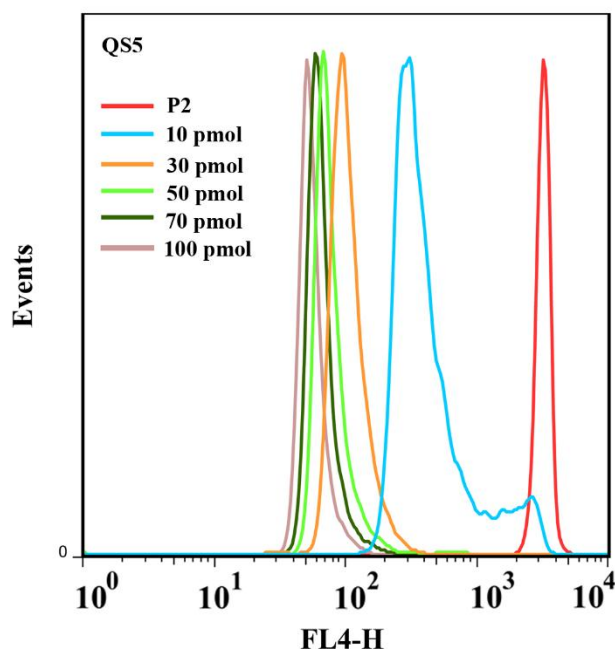

**Figure S3.** Fluorescence changes of P2 modified microbeads in the presence of different amount of QS5 DNA.

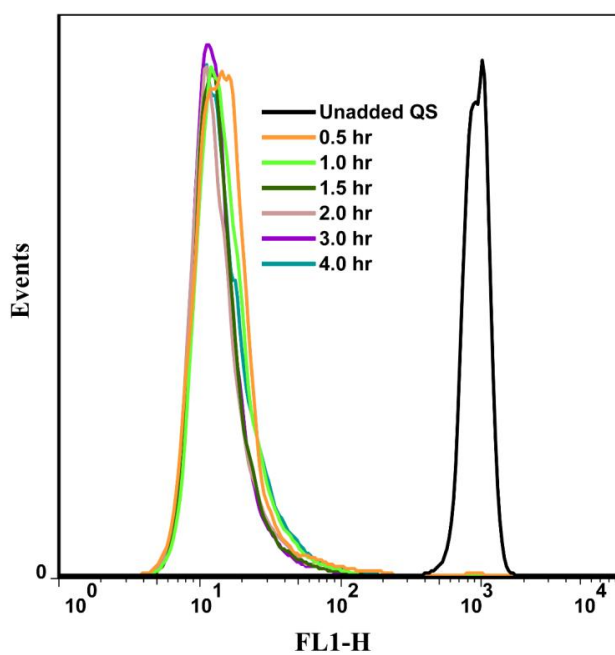

**Figure S4.** Effect of incubation time of QS3 DNA on the fluorescence of P1 modified microbeads.

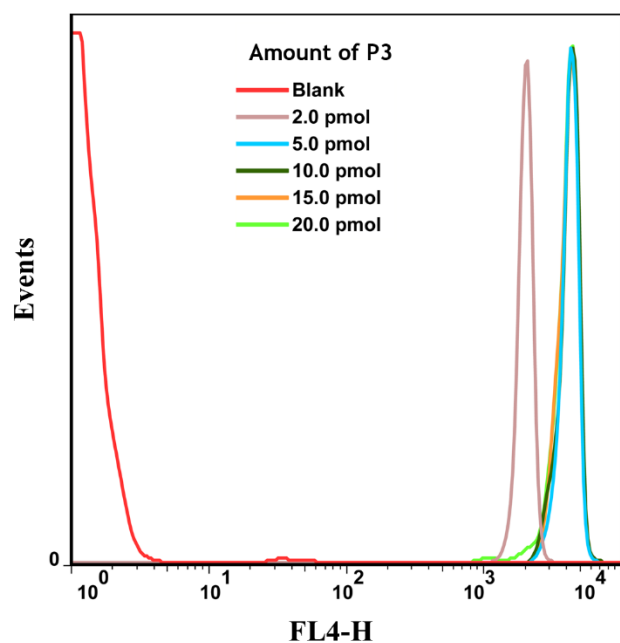

**Figure S5.** Effect of the amount of P3 on the fluorescence of microbeads.

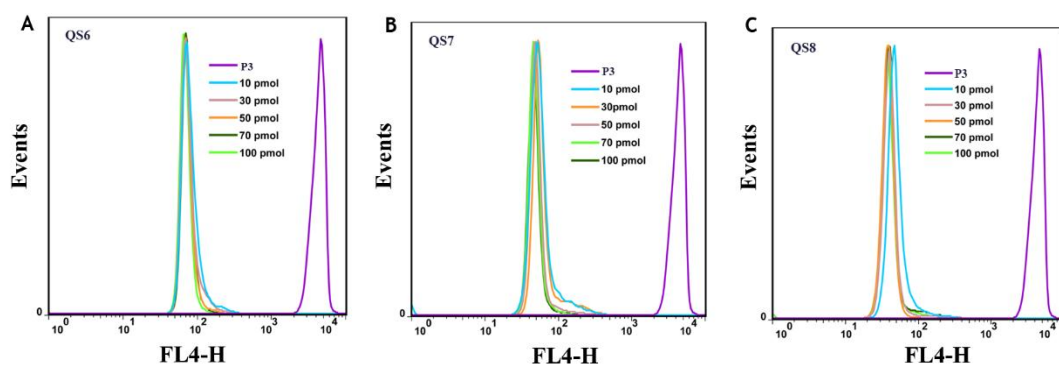

**Figure S6.** Fluorescence changes of P3 modified microbeads in the presence of different amount of QS (A, QS6; B, QS7; C, QS8) DNA.

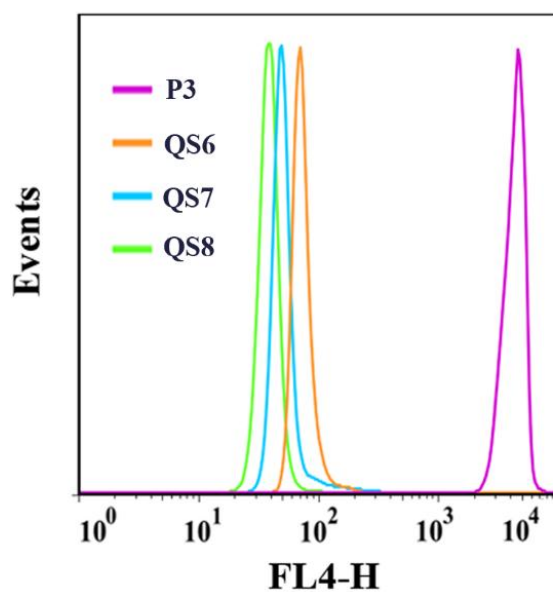

**Figure S7.** Effect of QS length on the quench efficiency of P3 modified microbeads.

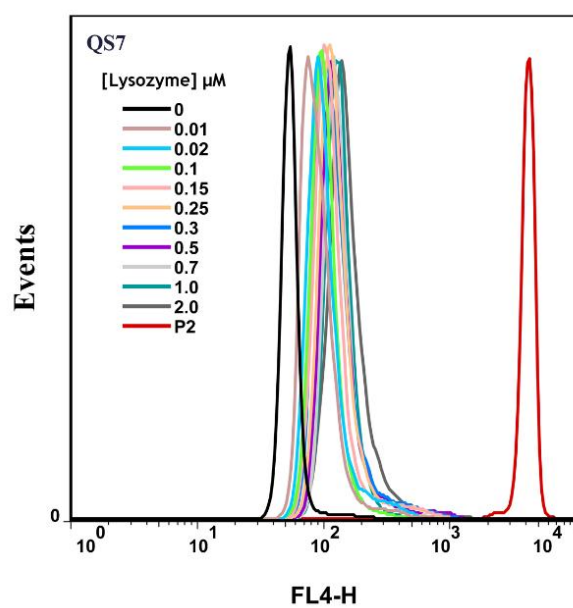

**Figure S8.** Fluorescence response of P3-QS7 modified microbeads to different concentrations of lysozyme (0, 0.01, 0.02, 0.1, 0.15, 0.25, 0.3, 0.5, 0.7, 1.0, 2.0  $\mu\text{M}$ ).

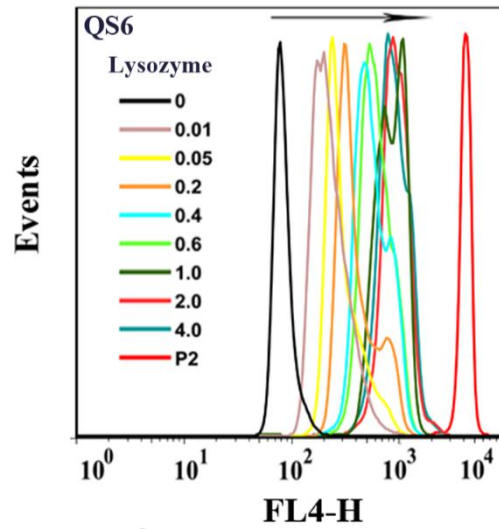

**Figure S9.** Fluorescence response of P3-QS6 modified microbeads to different concentrations of lysozyme (0, 0.01, 0.05, 0.2, 0.4, 0.6, 1.0, 2.0, 4.0  $\mu\text{M}$ ).

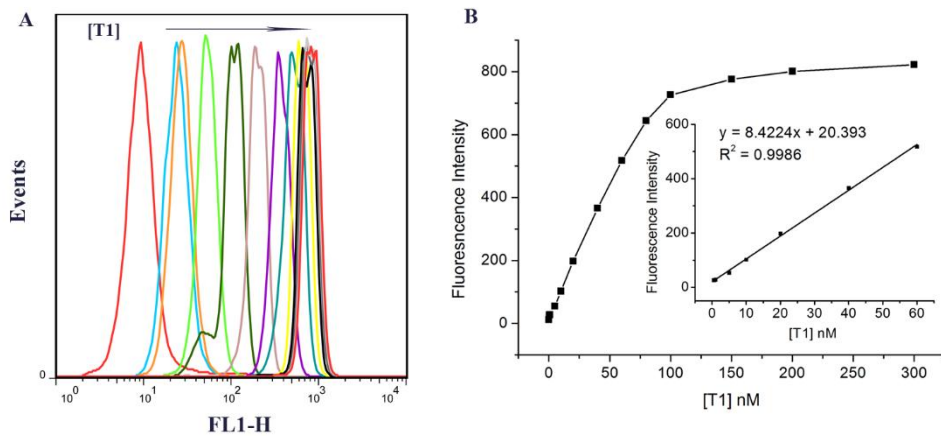

**Figure S10.** (A) Fluorescence response of P1-QS3 modified microbeads versus different final concentration of DNA T1 (0, 0.5, 1.0, 5.0, 10.0, 20.0, 40.0, 60.0, 80.0, 100.0, 150.0, 200.0, 300.0 nM) in the reaction mixture (beads solution / serum: 40  $\mu\text{L}$  / 10  $\mu\text{L}$ ; corresponding T1 concentration in serum was 0, 2.5, 5.0, 25.0, 50.0, 100.0, 200.0, 300.0, 400.0, 500.0, 750.0, 1000.0, 1500.0 nM). (B) plot of fluorescence intensity versus T1 concentration. Inset: Linear fitting curve.

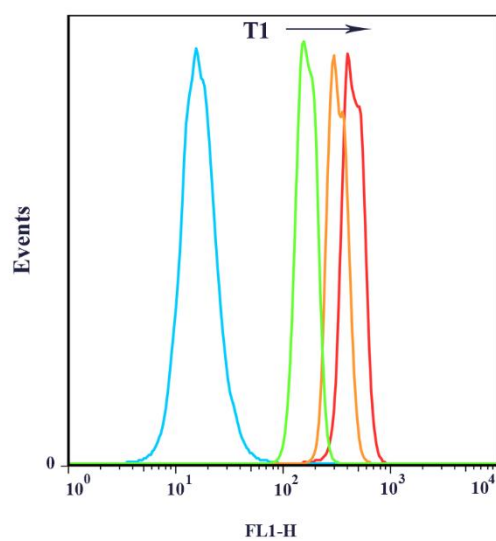

**Figure S11.** Fluorescence response of P1-QS3 modified microbeads to different concentration of DNA T1 (0, 100, 200, 250 nM) spiked in human serum.
